# Supplementary material for: Transcriptomic Analysis in Human Macrophages Infected with Therapeutic Failure Clinical Isolates of Leishmania infantum
Source: PubMed Central journal article supplement (PMC9003231; doi:10.1021/acsinfecdis.1c00513), 2022-03-30
Supplement: id1c00513_si_001.pdf [file id1c00513_si_001.pdf]

## **Supporting Information**

Transcriptomic analysis in human macrophages infected with therapeutic failure clinical isolates of *Leishmania infantum*

Ana Perea-Martínez<sup>a</sup>, Raquel García-Hernández<sup>b</sup>, José Ignacio Manzano<sup>c</sup>, Francisco Gamarro<sup>d</sup>.

*Instituto de Parasitología y Biomedicina “López-Neyra”, IPBLN-CSIC, Parque Tecnológico de Ciencias de la Salud, Avda. del Conocimiento s/n, 18016 Armilla, Granada, Spain.*

<sup>a</sup>[anapereama@ipb.csic.es](mailto:anapereama@ipb.csic.es). <sup>b</sup>[raquelg@ipb.csic.es](mailto:raquelg@ipb.csic.es). <sup>c</sup>[nacho.manzano@ipb.csic.es](mailto:nacho.manzano@ipb.csic.es).

<sup>d</sup>[gamarro@ipb.csic.es](mailto:gamarro@ipb.csic.es)

### **Table of Contents**

|                                               |           |
|-----------------------------------------------|-----------|
| <b>Table S1. RNAseq reads of THP-1 cells</b>  | <b>S2</b> |
| <b>Table S2. Primer sequences for RT-qPCR</b> | <b>S3</b> |

**Table S1. RNAseq reads of THP-1 cells**

| Sample name             | Initial reads <sup>a</sup> | Homogenized Reads <sup>b</sup> | Aligned Reads <sup>c</sup>     | Final reads <sup>d</sup> | Spearman correlation |           |           |
|-------------------------|----------------------------|--------------------------------|--------------------------------|--------------------------|----------------------|-----------|-----------|
|                         |                            |                                |                                |                          | Rho R1_R2            | Rho R1_R3 | Rho R2_R3 |
| Hi-L2165 R1             | 37305366                   | 14640356                       | 10449564 (71.38%) <sup>e</sup> | 4617423                  |                      |           |           |
| Hi-L2165 R2             | 36357116                   | 14080836                       | 10437034 (74.12%)              | 4622659                  | 0.8504               | 0.8521    | 0.8492    |
| Hi-L2165 R3             | 40279450                   | 14587072                       | 10438894 (71.56%)              | 4618914                  |                      |           |           |
| Hi-L2221 R1             | 15766016                   | 15766016                       | 8377808 (53.14%)               | 3822637                  |                      |           |           |
| Hi-L2221 R2             | 15007286                   | 14217352                       | 8338666 (58.65%)               | 3822006                  | 0.8485               | 0.8491    | 0.8501    |
| Hi-L2221 R3             | 15183074                   | 15183074                       | 7933198 (52.25%)               | 3610876                  |                      |           |           |
| Hi-LJPC R1              | 70161332                   | 12851868                       | 10494162 (81.65%)              | 4626503                  |                      |           |           |
| Hi-LJPC R2              | 71533386                   | 12514220                       | 10468334 (83.65%)              | 4622522                  | 0.8422               | 0.8365    | 0.8345    |
| Hi-LJPC R3              | 64492256                   | 12454024                       | 10354376 (83.14%)              | 4607134                  |                      |           |           |
| Hi-L2070 R1             | 36183688                   | 14474940                       | 10615282 (73.34%)              | 4631126                  |                      |           |           |
| Hi-L2070 R2             | 36810964                   | 14569862                       | 14569862 (72.43%)              | 4627814                  | 0.8501               | 0.8509    | 0.8504    |
| Hi-L2070 R3             | 38067316                   | 15030990                       | 10582324 (70.40%)              | 4623885                  |                      |           |           |
| Hi-L2255 R1             | 15766016                   | 14563422                       | 10767024 (72.31%)              | 4631672                  |                      |           |           |
| Hi-L2255 R2             | 15007286                   | 15186194                       | 10384472 (68.38%)              | 4613996                  | 0.8512               | 0.848     | 0.8507    |
| Hi-L2255 R3             | 15183074                   | 14296376                       | 10342598 (72.34%)              | 4618494                  |                      |           |           |
| Phagocytosis control R1 | 14155514                   | 12354592                       | 10767024 (87.15%)              | 4632581                  |                      |           |           |
| Phagocytosis control R2 | 13873380                   | 12485250                       | 10876472 (87.11%)              | 4637532                  | 0.8443               | 0.8444    | 0.8436    |
| Phagocytosis control R3 | 11808612                   | 11808612                       | 10758070 (91.10%)              | 4635661                  |                      |           |           |
| Uninfected cells R1     | 16249142                   | 12086856                       | 10886286 (90.07%)              | 4637856                  |                      |           |           |
| Uninfected cells R2     | 16181098                   | 11665374                       | 10894640 (93.39%)              | 4637532                  | 0.8458               | 0.8457    | 0.8462    |
| Uninfected cells R3     | 15900940                   | 12007916                       | 10948074 (91.17%)              | 4637311                  |                      |           |           |

<sup>a</sup>Reads obtained directly from the sequencer. <sup>b</sup>Reads randomly selected by seqtk to produces scaled reads files. <sup>c</sup>Reads aligned to human genome.

<sup>d</sup>Aligned reads quantified in coding exons. <sup>e</sup>Percentage of reads aligned to human genome.

**Table S2. Primer sequences for RT-qPCR**

| <b>Genes</b>   |   | <b>Primer Sequences (5'→3')</b> |
|----------------|---|---------------------------------|
| <i>ABCG1</i>   | F | AGGAGAAGGATGAAGGCAGA            |
|                | R | GAAGAACATGACTGGAGGGT            |
| <i>ABCG2</i>   | F | TTTATCCGTGGTGTGTCTGG            |
|                | R | TTGTTTCGTCCCTGCTTAGA            |
| <i>ANO5</i>    | F | AGAACCTCCCAATCCTACCA            |
|                | R | TCAAGTCTAAAGGCTGCTCC            |
| <i>AQP9</i>    | F | AGTTCTTGGGAGCCTTTGTG            |
|                | R | TCGCCAGAGATAGATACGGAG           |
| <i>BDH1</i>    | F | CGTCGTCAATATCAGCAGCA            |
|                | R | TGTGACAGCATCGATGACAG            |
| <i>COL4A1</i>  | F | TCCCTGGTGAAAGAGGAGAA            |
|                | R | GCGGCTGACATTCCACAAT             |
| <i>CYP19A1</i> | F | GTGACCAATGAATCGGGCTA            |
|                | R | TTTGATGAGGAGAGCTTGCC            |
| <i>DHDH</i>    | F | CATCGGCATCTACTGTGTCC            |
|                | R | AGTGTCATCCACACCTGTTTC           |
| <i>FBP1</i>    | F | GCTGAGACTGCTGTACGAAT            |
|                | R | CTCTGGTGAATGTCTGTGGG            |
| <i>HMOX1</i>   | F | AAAGATTGCCCAGAAAGCCC            |
|                | R | GCTGAGTGTAAGGACCCATC            |
| <i>PDK4</i>    | F | TTAAGAATGCAATGCGGGC             |
|                | R | ACCACCTCCTCTGTCTGAA             |
| <i>SUCNR1</i>  | F | AAAGCAGAGGAATAGGCAGG            |
|                | R | AAAGCACAGAGAAGATTACCAC          |
| <i>ACTB</i>    | F | ATTGCCGACAGGATGCAGAA            |
|                | R | GCTGATCCACATCTGCTGGAA           |

RT-qPCR, Reverse transcriptase quantitative PCR.; F, Forward; R, Reverse
